# Supplementary material for: The Imageable Genome
Source: PubMed Central journal article supplement (PMC10643363; doi:10.1038/s41467-023-43123-3), 2023-11-13
Supplement: 41467_2023_43123_MOESM3_ESM.pdf [file 41467_2023_43123_MOESM3_ESM.pdf]

## Description of Additional Supplementary Files

**Supplementary Data 1:** The AI training datasets info.

**Supplementary Data 2:** The full list of radiotracer-protein-gene associations: the *Imageable Genome*.

**Supplementary Data 3:** The VST (Variance stabilizing transformation) value of 1161 imageable genes across 24 healthy organs.

**Supplementary Data 4:** The full list of imageable markers highly expressed in each brain development time window. Statistics derived from n=607 brains (n=30 window1, n=90 window2, n=54 window3, n=58 window4, n=76 window5, n=72 window6, n=72 window7, n=60 window8, n=95 window9).

**Supplementary Data 5:** The full list of imageable markers highly expressed in each fetal brain region. Statistics derived from n=16 fetal brain regions (n varies from 4 to 14 for each region).

**Supplementary Data 6:** The full list of imageable markers highly expressed in each postnatal brain region. Statistics derived from n=16 postnatal brain regions (n of each region varies from 15 to 20).

**Supplementary Data 7:** Adult brain imageable cell type signatures.

**Supplementary Data 8:** The full list of imageable markers up-/down-regulated in early-AD (n=15) versus control (n=24) or late-AD (n=9) versus early-AD, filtered at Mean\_count\_in>0.3 and  $|\log_2(\text{fold change})| > 0.25$ .

**Supplementary Data 9:** The full list of imageable markers up-/down-regulated in Autism (n=43), Schizophrenia (n=558), Bipolar disorder (n=216) versus normal condition (n=986).

**Supplementary Data 10:** The full list of un-imageable markers highly expressed in brain development time window.

**Supplementary Data 11:** The full list of un-imageable markers highly expressed in each fetal brain region.

**Supplementary Data 12:** The full list of un-imageable markers highly expressed in each postnatal brain region.

**Supplementary Data 13:** Adult brain cell type markers.

**Supplementary Data 14:** The full list of un-imageable markers up-/down-regulated in early-AD (n=15) versus control (n=24) / late-AD (n=9) versus early-AD.

**Supplementary Data 15:** The full list of un-imageable markers up-/down-regulated in Autism (n=43), Schizophrenia (n=558), Bipolar disorder (n=216) versus normal condition (n=986).

**Supplementary Data 16:** Top ranked imageable temporal markers during early embryonic heart development.

**Supplementary Data 17:** Full list of unique imageable regional markers of early embryonic heart.

**Supplementary Data 18:** Full list of regional and cell type imageable markers of adult heart.

**Supplementary Data 19:** Adult global imageable heart cell type markers.

**Supplementary Data 20:** Full list of disease/cell type-specific imageable markers in 2 human heart failure (HF) diseases. (Koenig, Nature Cardiovascular Research, 2022): 17 dilated cardiomyopathy and 28 healthy donors; (Wang, Nature Cell Biology 2020): 4 dilated cardiomyopathy / 2 coronary heart failure and 14 healthy donors.

**Supplementary Data 21:** Top un-imageable temporal markers during early embryonic heart development.

**Supplementary Data 22:** Full list of unique un-imageable regional markers of early embryonic heart.

**Supplementary Data 23:** Full list of regional and cell type un-imageable markers of adult heart.

**Supplementary Data 24:** Adult global heart un-imageable cell type markers.

**Supplementary Data 25:** Full list of disease/cell type-specific un-imageable markers in 3 human heart failure (HF) diseases.

**Supplementary Data 26:** Ovarian cancer imageable stage markers.

**Supplementary Data 27:** Full list of imageable markers of lung cancer metastasis. Statistics derived from pairwise comparisons between primary- (n tLung = 6352) versus advanced-stage primary (n tL/B= 6400), primary- versus metastatic cancer cells (n mLN = 2961, n mBrain = 15423, PE=396).

**Supplementary Data 28:** Full list of diagnostic imageable markers for 20 TCGA cancer types. For each cancer type, statistics derived from comparisons between primary solid tumor samples versus solid tissue normal samples. p values from Limma (voom()) moderate test corrected for multiple testing  $<0.01$  and  $\log_2(\text{fold change}) > 0.5$ .

**Supplementary Data 29:** Full list of imageable markers with their predictive capacity for PD1-blockage response in ipi naïve melanoma patients. Genes are filtered at  $\text{AUC} > 0.6$  or  $\text{AUC} < 0.35$ . P-values are calculated using the Wilcoxon rank-sum test with R function from package verification roc.area() (version 1.42).

**Supplementary Data 30:** Full list of prognostic imageable markers. The multivariable survival analyses were performed by initially computing univariable hazard ratios (95% CI) for each diagnostic IG markers that passed univariate test (  $p$  value $<0.05$  from two-sided Log-Rank test) with best cutoff determined by R function `surv_cutpoint()` (Package "survminer"); followed by fitting Cox proportional hazards models (CPH) with best cutoff, filtered at adjusted  $p$  value  $<0.05$  (corrected for multiple testing on  $p$  values from Wald statistic) &  $HR>1.5$  |  $HR<0.7$ .

**Supplementary Data 31:** Ovarian cancer un-imageable stage markers.  $P$  values from two-sided Wilcoxon test.  $\log_2$ FoldChange calculated average expression of gene in tested group relative to the average expression in reference group.

**Supplementary Data 32:** Full list of un-imageable markers of lung cancer metastasis. Statistics derived from pairwise comparisons between primary- (n tlung = 6352) versus advanced-stage primary (n tL/B= 6400), or primary- versus metastatic cancer cells (n mLN = 2961, n mBrain = 15423).

**Supplementary Data 33:** Full list of diagnostic un-imageable markers for 23 TCGA cancer types. For each cancer type, statistics derived from comparisons between primary solid tumor samples versus solid tissue normal samples.  $p$  values from Limma moderate test corrected for multiple testing $<0.001$  and  $\log_2(\text{fold change})>5$ .

**Supplementary Data 34:** Full list of un-imageable markers with their predictive capacity for PD1-blockage response in ipi naïve melanoma patients. Genes are filtered at  $AUC>0.6$  or  $AUC<0.35$ .

**Supplementary Data 35:** Full list of prognostic un-imageable markers. Top background DEGs passed univariate test ( $\log_2(\text{fold change})>0.5$  &  $p$  value $<0.05$  from two-sided Log-Rank test), and multivariate test with best cutoff, filtered at adj. $p<0.001$ ( corrected for multiple testing on  $p$  values from Wald statistic) &  $HR>1.5$  |  $HR<0.7$ .

**Supplementary Data 36:** Top 10 clinical frequently used PET radiotracers and their clinical applications.

**Supplementary Data 37:** The full list of prognostic capacity of top 10 clinical frequently used PET radiotracers.
